# Supplementary material for: Analysis of the Origin and Dissemination of HIV-1 Subtype C in Bulgaria
Source: MDPI journal article supplement (doi:10.3390/v14020263), 2022-01-27
Supplement: s1 [file s1]

**Table S1.** Specially selected HIV-1 subtype C sequences from the global search.

| Country code | Country       | Sequence number | Continent |
|--------------|---------------|-----------------|-----------|
| BW           | BOTSWANA      | 76              | Africa    |
| ET           | ETHIOPIA      | 24              | Africa    |
| KE           | KENYA         | 5               | Africa    |
| MW           | MALAWI        | 24              | Africa    |
| NG           | NIGERIA       | 2               | Africa    |
| SN           | SENEGAL       | 1               | Africa    |
| SO           | SOMALIA       | 1               | Africa    |
| TZ           | TANZANIA      | 77              | Africa    |
| ZA           | SOUTH AFRICA  | 505             | Africa    |
| ZM           | ZAMBIA        | 817             | Africa    |
| AR           | Argentina     | 1               | America   |
| BR           | BRAZIL        | 22              | America   |
| US           | UNITED STATES | 10              | America   |
| UY           | URUGUAY       | 1               | America   |
| CN           | CHINA         | 9               | Asia      |
| IL           | ISRAEL        | 5               | Asia      |
| IN           | INDIA         | 43              | Asia      |
| NP           | NEPAL         | 8               | Asia      |
| PK           | PAKISTAN      | 1               | Asia      |
| YE           | YEMEN         | 1               | Asia      |
| CY           | CYPRUS        | 12              | Europe    |
| DK           | DENMARK       | 2               | Europe    |
| ES           | SPAIN         | 9               | Europe    |
| GE           | GEORGIA       | 1               | Europe    |
| RO           | ROMANIA       | 27              | Europe    |
| SE           | SWEDEN        | 47              | Europe    |

**Table S2.** Bayes factor (BF) comparison of the nested molecular clock and Bayesian demographic models. The natural logarithm of the BF was used for comparison of the strict clock (SC) and uncorrelated relaxed lognormal clock (RC) models and the constant and non-parametric Bayesian skyline plot (BSP) demographic models within BEAST 1.8.3.

| Molecular clock and demographic models | SS <sup>4</sup> | ln BF SS | PS <sup>5</sup> | ln BF PS |
|----------------------------------------|-----------------|----------|-----------------|----------|
| SC <sup>1</sup>                        | -29828,05672    |          | -29821,75231    |          |
| Constant                               |                 |          |                 |          |
| RC <sup>2</sup>                        | -29785,25666    | 42,8     | -29780,02731    | 41,73    |
| Constant                               |                 |          |                 |          |
| RC <sup>2</sup>                        | -29785,25666    |          | -29780,02731    |          |
| Constant                               |                 |          |                 |          |
| RC <sup>1</sup>                        | -29372,833      | 412,42   | -29357,34271    | 422,68   |
| BSP <sup>3</sup>                       |                 |          |                 |          |
| SC <sup>1</sup>                        | -29411,54915    |          | -29398,0643     |          |
| BSP <sup>3</sup>                       |                 |          |                 |          |
| RC <sup>2</sup>                        | -29372,833      | 38,72    | -29357,34271    | 40,72    |
| BSP <sup>3</sup>                       |                 |          |                 |          |

<sup>1</sup>SC = Strict Clock; <sup>2</sup>RC = Uncorrelated Relaxed Lognormal Clock; <sup>3</sup>BSP = Bayesian skyline plot; <sup>4</sup>SS = Stepping stone sampling; <sup>5</sup>BF = Bayes Factor; <sup>6</sup>PS = Path sampling

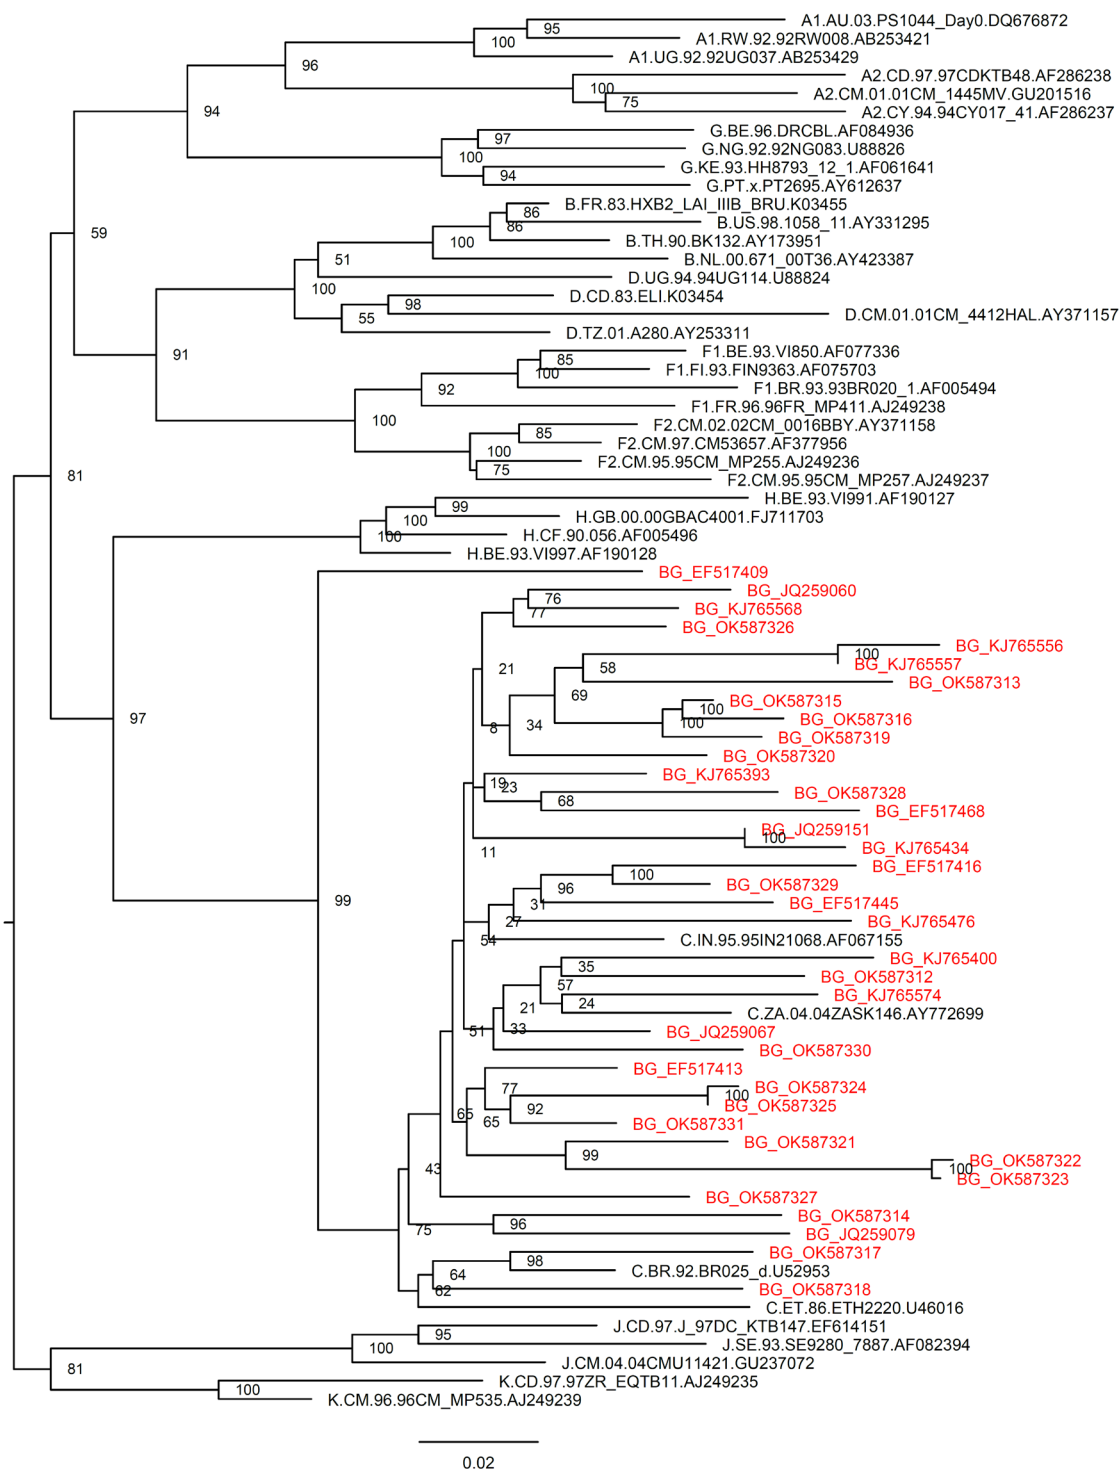

**Figure S1.** Inferred phylogenetic relationships of Bulgarian HIV-1 and subtype reference sequences. Tree reconstruction was inferred using ML analysis of polymerase sequences implemented in IQ-TREE. Support for each node was determined using ultrafast bootstrap with 1000 replicates. Scale bar at the bottom of the tree indicates the number of nucleotide substitutions per site. Antiretroviral resistance associated mutations were stripped from the alignments. The 723-bp alignment consisted of 37 HIV-1 subtype C strains from Bulgaria and 39 Group M reference sequences from the Los Alamos HIV database. The tree was rooted by using an HIV-1 subtype J strains as the outgroup. Bulgarian sequences are shown using red taxon names.
